# Supplementary material for: A tumor spheroid array chip for high-fidelity evaluation of liposomal drug delivery through the EPR effect
Source: Royal Society of Chemistry journal article supplement (doi:10.1039/d5lc00893j), 2025-12-23
Supplement: d5lc00893j1.pdf [file d5lc00893j1.pdf]

## Supplementary Information

A Tumor Spheroid Array Chip for High-Fidelity Evaluation of Liposomal Drug Delivery Through the EPR Effect

Yedam Lee<sup>†</sup>, Sujin Kim<sup>†</sup>, Hyeyeon Koh, Yeonwoo Park, Jung Y. Han<sup>\*</sup>, and Jihoon Ko<sup>\*</sup>

Department of BioNano Technology, Gachon University, Seongnam-si, Gyeonggi-do 13120,  
Republic of Korea

Email: [jhan@gachon.ac.kr](mailto:jhan@gachon.ac.kr) (Jung Y. Han); [koch@gachon.ac.kr](mailto:koch@gachon.ac.kr) (Jihoon Ko)

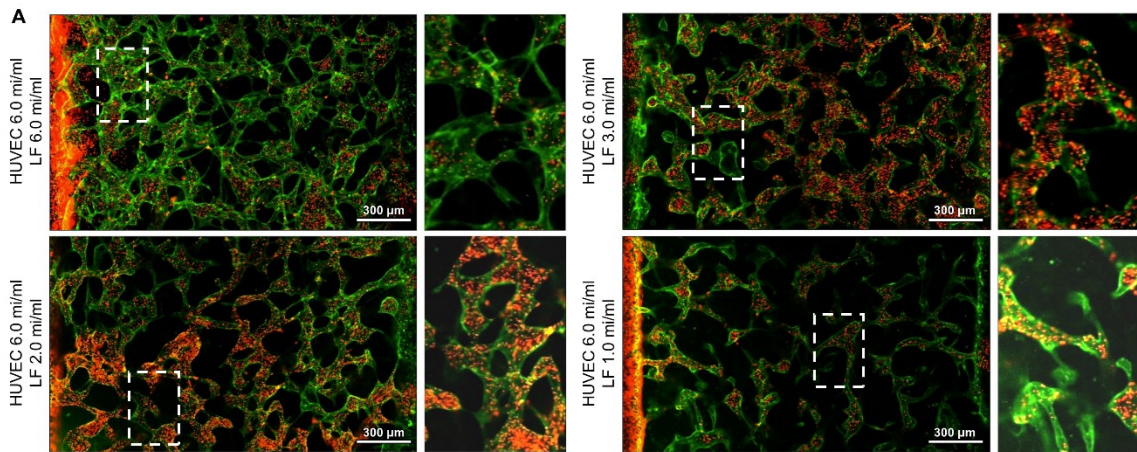

Figure S1. Robust formation of perfusable vascular networks under optimized co-culture conditions in the TSA-Chip. (A) Fluorescence images showing vascular network morphology under varying lung fibroblast (LF) concentrations, with HUVECs fixed at  $6.0 \times 10^6$  cells/mL. Vessels were labeled with lectin (green), and LFs were visualized with a red cell tracker. White dashed boxes indicate regions shown at higher magnification. Scale bars: 300  $\mu$ m.
